# Supplementary material
Source: Research Square preprint supplement (doi:10.21203/rs.3.rs-8921240/v1)
Supplement: Supplementary file 1 [file 77fc196d5cf04bbbfb086ee8.docx]

**Integrative Transcriptomic Analysis Identifies a Novel 22-Gene Signature Driving Breast Cancer Progression via the Proteasome-Chemokine Axis**

Md. Shakawat Hossain1*

1Department of Biochemistry and Molecular Biology

Shahjalal University of Science and Technology (SUST), Sylhet-3114, Bangladesh.

*Correspondence:

Md. Shakawat Hossain

Department of Biochemistry and Molecular Biology

Shahjalal University of Science and Technology, Sylhet-3114, Bangladesh.

Email: [shakawathossain96907@gmail.com](mailto:shakawathossain96907@gmail.com)

ORCID: <https://orcid.org/0009-0008-5050-2275>

**Supplementary Figures**

**
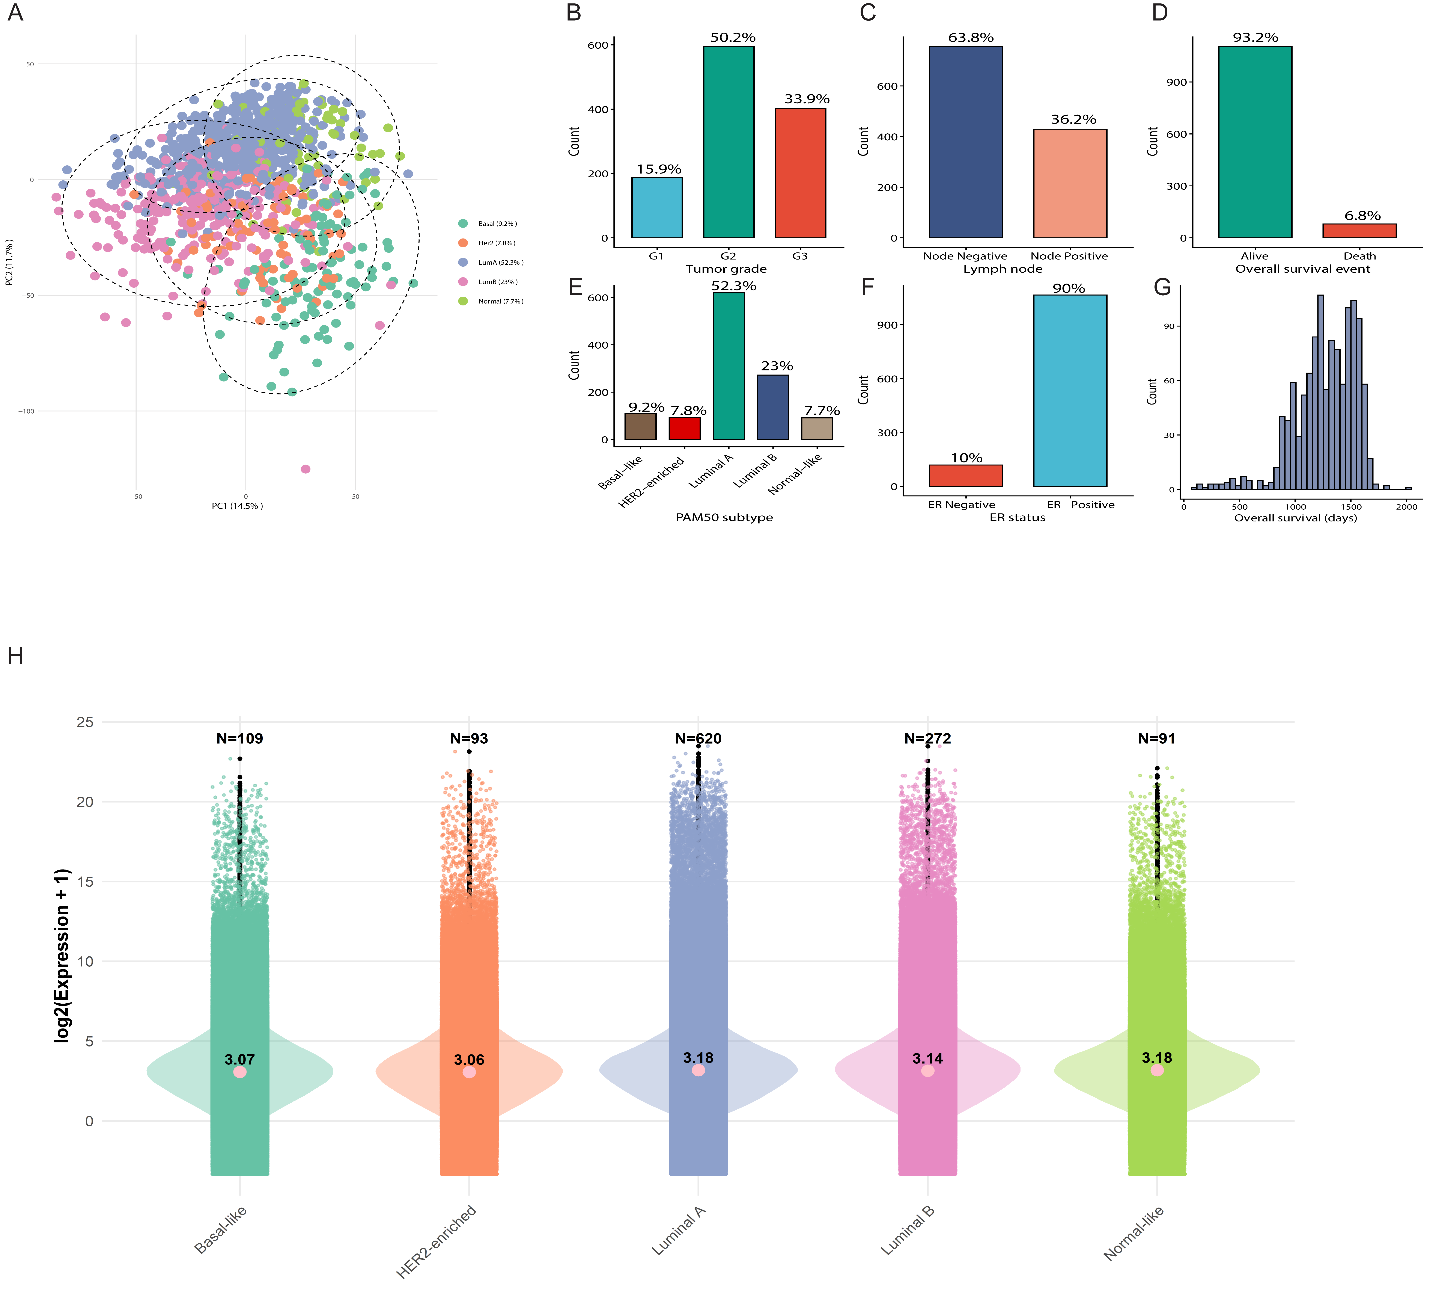
**

**Supplementary Figure S1**: Transcriptomic quality control and clinical stratification. **(a)** Unsupervised Principal Component Analysis (PCA) of the processed transcriptome (N=1,185). The orthogonal separation of intrinsic subtypes along PC1 (14.5%) and PC2 (11.7%) confirms the preservation of biological heterogeneity. **(b–f)** Distribution of clinicopathological covariates: **(b)** Tumor Grade, **(c)** Lymph Node Status, **(d)** Overall Survival Event (Alive vs. Death), **(e)** PAM50 Molecular Subtypes, and **(f)** ER Status. **(g)** Distribution of Overall Survival follow-up times (days). **(h)** Normalization assessment. Boxplots of log2-transformed expression intensities demonstrate aligned medians (~3.1) across all subtypes, validating the removal of systematic technical bias.

**Table S3:** The 22-gene prognostic signature derived from LASSO Cox regression along with their biological functional annotations and risk classification.

| Gene Symbol | Coef. (λmin​) | Risk Type | Biological Interpretation & Relevance |
| --- | --- | --- | --- |
| *TK1* | +0.070 | Risk | **Thymidine Kinase 1:** Key enzyme in DNA salvage pathway; established marker of cell proliferation and high tumor grade. |
| *MARCO* | +0.058 | Risk | **Macrophage Receptor:** Often expressed on M2-polarized (immunosuppressive) tumor-associated macrophages; promotes tolerance. |
| *CCL8* | +0.019 | Risk | **Chemokine (C-C motif) Ligand 8:** Promotes cancer cell migration, epithelial-mesenchymal transition (EMT), and metastasis. |
| *AB306139* | -0.060 | Protective | **LncRNA:** Putative long non-coding RNA; likely functions as a tumor suppressor or transcriptional regulator in this context. |
| *TP63* | -0.053 | Protective | **Tumor Protein p63:** p53 homolog; essential for maintaining epithelial integrity and inhibiting stem-like dedifferentiation. |
| *SLC7A2* | -0.045 | Protective | **Cationic Amino Acid Transporter:** Transports arginine; critical for T-cell proliferation and macrophage activity (M1 polarization). |
| *CXCL13* | -0.039 | Protective | **B-cell Attracting Chemokine:** Critical for forming Tertiary Lymphoid Structures (TLS), a strong predictor of immunotherapy response. |
| *ADAMTS15* | -0.034 | Protective | **Metallopeptidase:** Modulates extracellular matrix (ECM); exerts anti-angiogenic effects and inhibits tumor invasion. |
| *ELOVL2* | -0.030 | Protective | **Fatty Acid Elongase:** Synthesizes polyunsaturated fatty acids (PUFAs); alteration affects membrane fluidity and signaling. |
| *SCARA5* | -0.030 | Protective | **Scavenger Receptor Class A:** Functions as a tumor suppressor by inhibiting FAK signaling and tumor proliferation. |
| *CLIC6* | -0.025 | Protective | **Chloride Intracellular Channel:** Involved in fluid transport and cell cycle regulation; downregulation is linked to poor prognosis. |
| *NAT1* | -0.020 | Protective | **Arylamine N-acetyltransferase 1:** Metabolic enzyme; high expression is strongly associated with favorable outcomes in hormone-dependent cancers. |
| *TCRVB* | -0.017 | Protective | **T-Cell Receptor Variable Beta:** Marker of T-cell diversity and infiltration; indicates a robust adaptive immune response. |
| *TFF1* | -0.015 | Protective | **Trefoil Factor 1:** Mucosal protection protein; expression often correlates with well-differentiated, less aggressive tumor phenotypes. |
| *GRPR* | -0.013 | Protective | **Gastrin-Releasing Peptide Receptor:** G-protein coupled receptor; associated with neuroendocrine differentiation (favorable in specific contexts). |
| *PTGER3* | -0.011 | Protective | **Prostaglandin E Receptor 3:** Modulates inflammation and cAMP signaling; loss of expression can enhance tumorigenesis. |
| *FCER1A* | -0.009 | Protective | **IgE Receptor (High Affinity):** Marker of mast cells and basophils; infiltration often correlates with anti-tumor immunity. |
| *AFF3* | -0.009 | Protective | **AF4/FMR2 Family Member 3:** Nuclear transcription factor; involved in lymphoid development and tissue differentiation. |
| *CHAD* | -0.007 | Protective | **Chondroadherin:** Cartilage matrix protein; mediates cell attachment and interacts with integrins to stabilize tissue structure. |
| *GSTM5* | -0.005 | Protective | **Glutathione S-Transferase Mu 5:** Detoxification enzyme; protects cells from oxidative stress and genomic instability. |
| *CYP4F22* | -0.003 | Protective | **Cytochrome P450:** Involved in lipid metabolism and barrier function; downregulation is linked to loss of differentiation. |
| *MIR635* | -0.003 | Protective | **MicroRNA-635:** Non-coding RNA; likely acts as a tumor suppressor by silencing oncogenic mRNA targets. |

**Table S4:** Detailed information of the signature genes including LASSO coefficients, risk type, and Entrez IDs used for functional enrichment.

| Gene | Coefficient | Risk Type | ENTREZID |
| --- | --- | --- | --- |
| *AB306139* | -0.06000 | Protective | N/A* |
| *ADAMTS15* | -0.03395 | Protective | 170689 |
| *AFF3* | -0.00875 | Protective | 3899 |
| *CCL8* | 0.019218 | Risk | 6355 |
| *CHAD* | -0.00692 | Protective | 1101 |
| *CLIC6* | -0.02543 | Protective | 54102 |
| *CXCL13* | -0.03924 | Protective | 10563 |
| *CYP4F22* | -0.00319 | Protective | 126410 |
| *ELOVL2* | -0.03004 | Protective | 54898 |
| *FCER1A* | -0.00877 | Protective | 2205 |
| *GRPR* | -0.01329 | Protective | 2925 |
| *GSTM5* | -0.00451 | Protective | 2949 |
| *MARCO* | 0.057588 | Risk | 8685 |
| *MIR635* | -0.00309 | Protective | 693220 |
| *NAT1* | -0.02022 | Protective | 9 |
| *PTGER3* | -0.01055 | Protective | 5733 |
| *SCARA5* | -0.02957 | Protective | 286133 |
| *SLC7A2* | -0.04484 | Protective | 6542 |
| *TCRVB* | -0.01700 | Protective | N/A* |
| *TFF1* | -0.01548 | Protective | 7031 |
| *TK1* | 0.069595 | Risk | 7083 |
| *TP63* | -0.05316 | Protective | 8626 |

*****Note**: Entrez IDs for LncRNA *AB306139* and *TCRVB* were not retrieved from the standard annotation database but are included in the model***.***

**Supplementary Data Files**

Due to the large size of the datasets, the following tables are provided in a separate Excel file named **"Supplementary_Data.xlsx"**:

- **Table S1:** List of significant genes identified by genome-wide univariate Cox regression analysis.
- **Table S2:** List of survival-relevant differentially expressed genes (DEGs) identified between tumor and normal tissues.
- **Table S5:** Detailed results of Gene Ontology (GO) enrichment analysis showing significant pathways and gene ratios.
